# Supplementary material for: Disposable capillary-fill device for the determination of proteases incorporating elimination of light-shielding from the magnetic beads with cleavage of the electrogenerated chemiluminescence label-tagged peptide probe
Source: Royal Society of Chemistry journal article supplement (doi:10.1039/d3an01591b), 2023-01-01
Supplement: d3an01591b1.pdf [file d3an01591b1.pdf]

## Supporting Information

### Disposable Capillary-fill Device for the Determination of Proteases Incorporating Eliminating Light-shield of Magnetic Beads with Cleavage of the Electrogenerated Chemiluminescence Label-tagged Peptide Probe

Xiaolin Yang,<sup>‡</sup> Jie Li,<sup>‡</sup> Honglan Qi, Qiang Gao, Chengxiao Zhang\*

*Key Laboratory of Analytical Chemistry for Life Science of Shaanxi Province, School of Chemistry and Chemical Engineering, Shaanxi Normal University, Xi'an, 710062, P.R. China*

<sup>‡</sup>Xiaolin Yang and Jie Li contributed equally to this work.

\*Corresponding author: E-mail: cxzhang@snnu.edu.cn.

#### Table of Content

##### 1. Experimental Section

- 1.1 Regents and apparatus
- 1.2 Synthesis of the MB ECL probes

##### 2. Results and discussion

- Figure S1** Chemical structure of the Ru1 and the peptide
  - Figure S2** Schematic representation of the ECL bioanalytic system
  - Figure S3** Fluorescence spectra of fluorescein solution mixed with MBs
  - Figure S4** Zeta potential of the MBs@SA and MBs@SA•Peptide-Ru1
  - Figure S5** EC and ECL characterization of the prepared SPCE
  - Figure S6** Contact angle of the pre-oxidized treatment SPCE
  - Figure S7** ECL intensity profiles of the MBs concentration, cleavage temperature and time
  - TableS1** Comparison of the linear range and detection limit with reported method
- References**

### **1.1 Regents and apparatus**

The conductive carbon paste (LOCTITE EDAG-423SS) was purchased from Loctite China Co., Ltd (China). The conductive silver and silver chloride past (Ag/AgCl=8/2, CIE-4250) was purchased from Guang Zhou City Silver Well trading Co., Ltd (China). PET substrates (3.5 cm × 2.5 cm, thickness=0.3 mm) and glass plate (3.3 cm × 2.5 cm, thickness=1.2 mm) were purchased from Xi'an Beiyin Biotechnology Co., Ltd (China). The small magnet ( $\varphi=8.0$  mm thickness=2.0 mm) was obtained from Shenzhen Min Magnetic Technology Co., Ltd. (China).

UV-Vis spectra were recorded with a UV-2450 UV-vis spectrophotometer (Shimadzu, Japan). Fluorescence spectra were performed on a Cary Eclipse Fluorescence Spectrophotometer (Agilent). An Olympus IX-51 inverted microscope (Olympus Corporation, Tokyo, Japan) that was equipped with a mercury lamp (Olympus) and Olympus Dual CCD DP80 camera were used to obtain fluorescence images, in which a filter set from Chroma with excitation filter centered at 490 nm (BP470-490), emission filter centered at 630 nm (BA520IF) which corresponds to the ruthenium complex. The transmission electron microscope (TEM) was performed on a FEI Tecnai G2 F20 Field Transmittance Electron (Oregon, USA).

### **1.2 Synthesis of the MB ECL probes**

The MBs ECL probes (MBs@SA•biotin-peptide-Ru1) were synthesized by binding biotinylated specific peptide with streptavidin-coated magnetic beads and then covalently coupling Ru1 with the lysine (K) of the peptide via an acylation reaction.<sup>1</sup> The chemical structure of the Ru1 and biotin-HSSKLQK peptide were present in Fig. S1. Firstly, 0.70 mg of the biotinylated specific peptide (biotin-HSSKLQK, 0.67  $\mu\text{mol}$ ) was dissolved in 1.0 mL of 1×PBS and then mixed with 750  $\mu\text{L}$  of streptavidin-coated magnetic beads (10 mg/mL,  $\varphi=2.8$   $\mu\text{m}$ ), incubated on a rocking shaker for 4 h. After being separated with magnetic separator and repeated washing with 1× PBS to remove uncoupled peptides, the MBs-peptide was re-suspended in 750  $\mu\text{L}$  of 1×PBS. Secondly, 100  $\mu\text{L}$  of DMF containing 1.0 mg Ru(bpy)<sub>2</sub>(mcbpy-O-Su-ester)(PF<sub>6</sub>)<sub>2</sub> was added into above suspension, incubated on a rocking shaker for 12 h. After being separated with magnetic separator and rinsed with 1× PBS to remove uncoupled Ru1. The MBs@SA•biotin-peptide-Ru1 were re-suspended in 100  $\mu\text{L}$  of 0.1% BSA, incubated at 37 °C for 2 h to block any remaining active surfaces. The blocked MBs@SA•biotin-peptide-Ru1 were rinsed for three times with 1× PBS and re-suspended in a final volume of 750  $\mu\text{L}$  of 1× PBS as the MBs ECL probe and stored at 2-8 °C. The concentration of MBs ECL probe was 10 mg /mL according to the amount of MBs@SA in case of no loss of MBs@SA. The work of the MBs ECL probe was diluted using 1× PBS to different concentrations as needed.

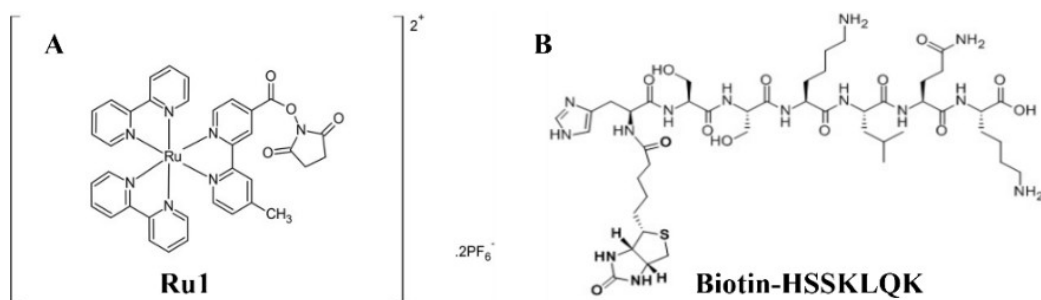

Fig. S1 Chemical structure of the Ru1 (A) and biotin-HSSKLQK peptide (B).

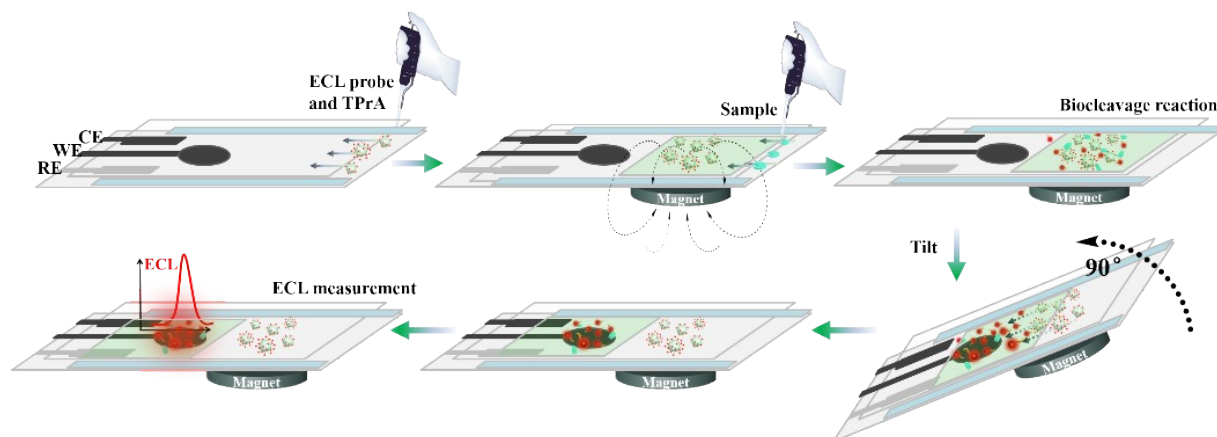

Fig. S2 Schematic representation of the ECL bioanalytic system for the determination of the PSA.

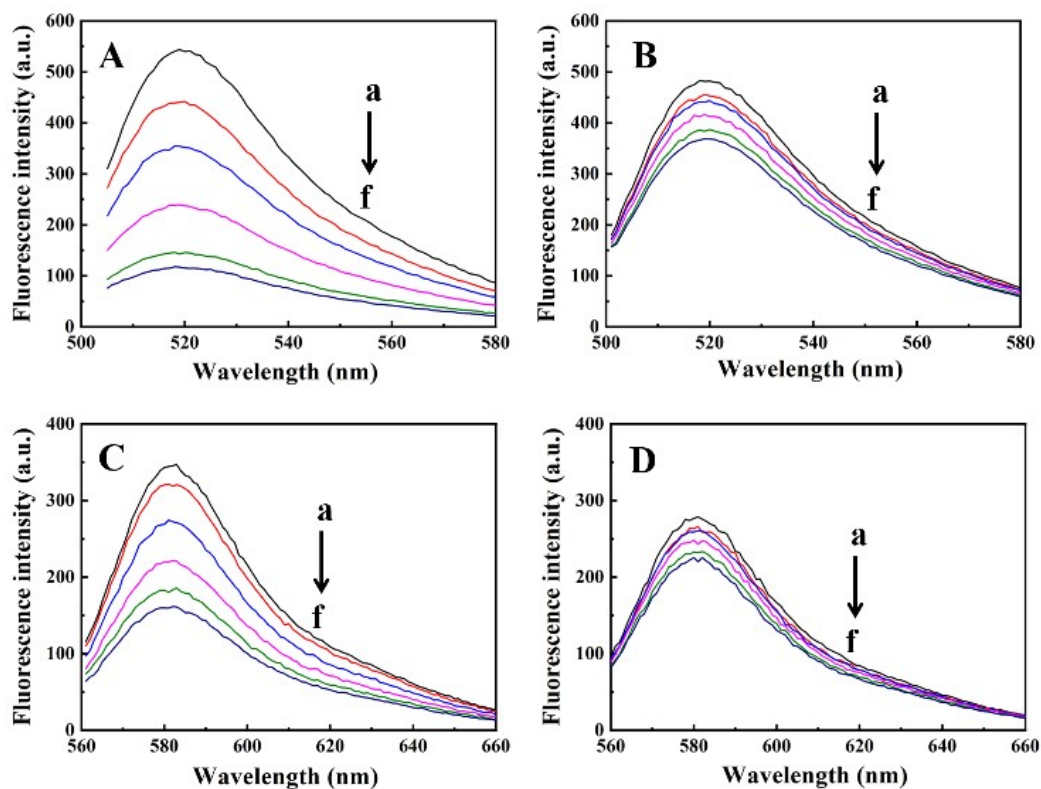

Fig. S3 Fluorescence spectra of 2.0  $\mu$ M FITC solution mixed with different concentrations of 0.20  $\mu$ m MBs (A) and 2.2  $\mu$ m MBs (B),  $\lambda_{ex}$ =493 nm, split width =5 nm; The fluorescence spectra of 5.0  $\mu$ M TRITC solution mixed with different concentrations of 0.20  $\mu$ m MBs (C) and 2.2  $\mu$ m MBs (D),  $\lambda_{ex}$ =550 nm, split width =5 nm. a-0, b-0.020, c-0.05, d-0.10, e-0.15 and f-0.20 mg/mL.

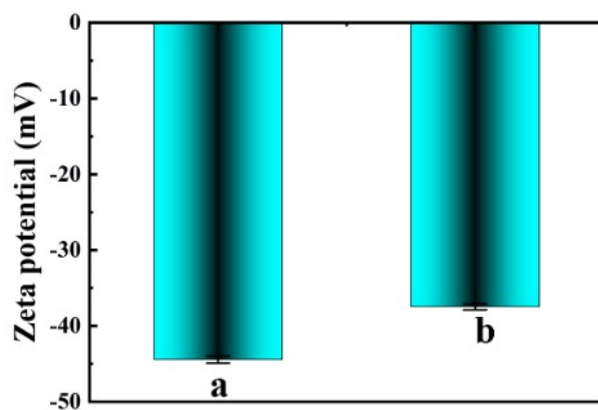

Fig. S4 Zeta potential of the MBs@SA (a) and MBs@SA•Peptide-Ru1 (b)

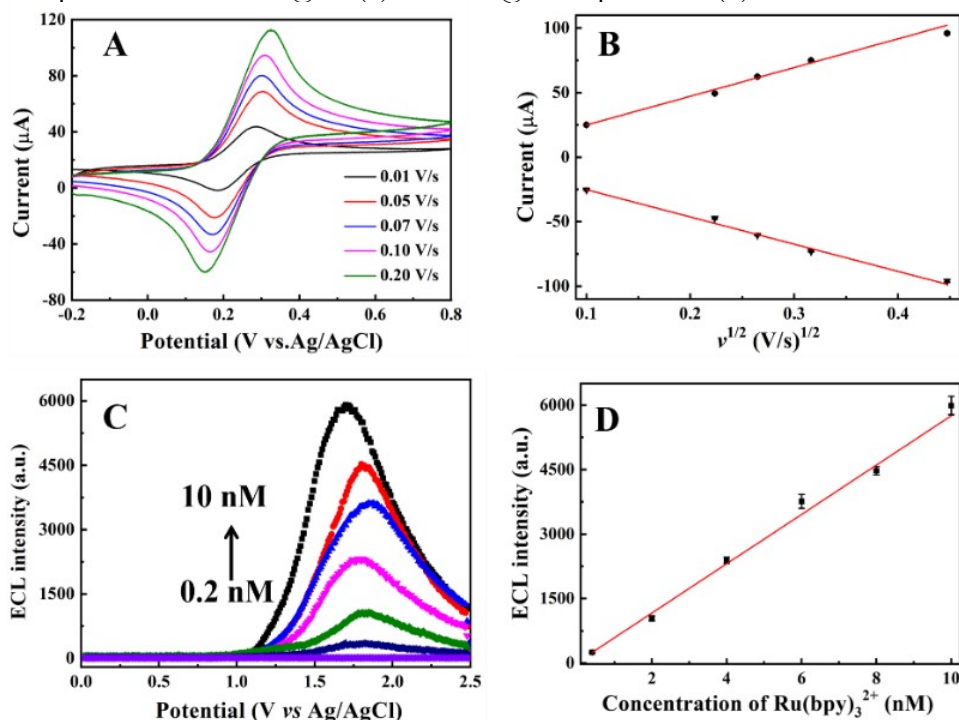

Fig. S5 (A) Cyclic voltammograms at the prepared SPCE ( $\varphi=6.0$  mm) in 0.10 M PBS (pH 7.40) containing 1.0 mM  $\text{Fc-CH}_2\text{OH}$  with different scan rates (0.01-0.20 mV/s); (B) Dependence of the peak currents on the square root of scan rates at SPCE. (C) The ECL intensity-potential curves at SPCE ( $\varphi=6.0$  mm) in 0.10 PBS (pH 7.40) containing 30 mM TPrA and different concentration of  $\text{Ru}(\text{bpy})_3\text{Cl}_2$  (0.2 to 10 nM) with a scan rate of 100 mV/s; PMT=-900V. (D) Dependence of the peak ECL intensity on the concentration of  $\text{Ru}(\text{bpy})_3\text{Cl}_2$ .

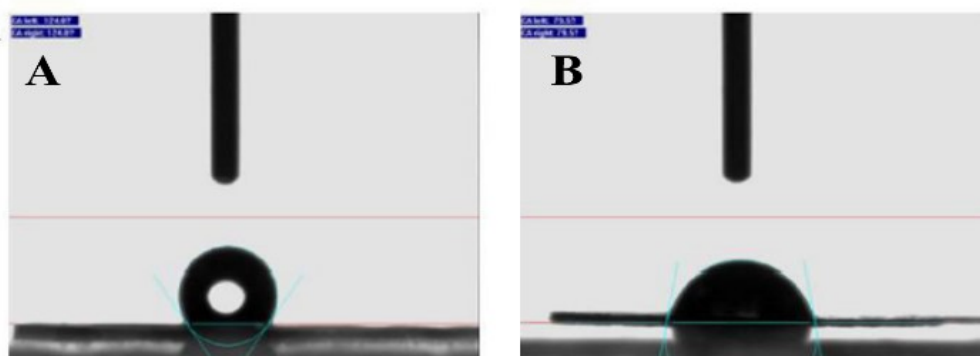

Fig. S6 Contact angle of the SPCE before (a) and after (B) preoxidized treatment.

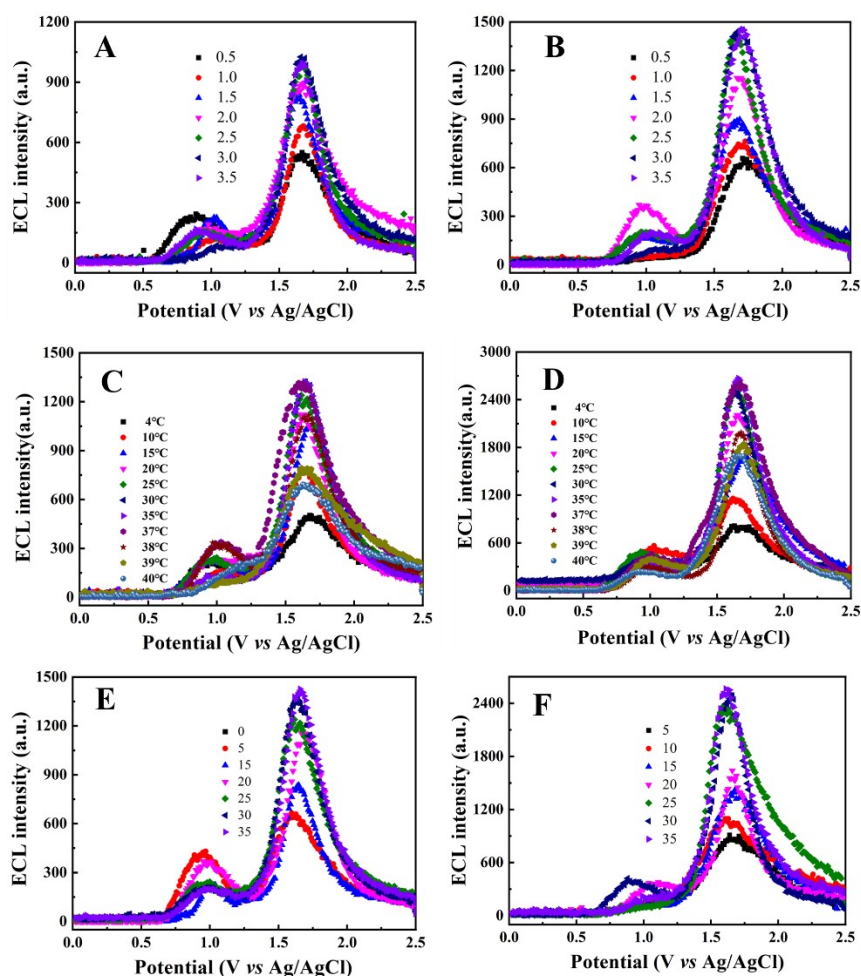

Fig. S7 The ECL intensity-potential profiles of different concentration of MBs ECL probe after adding (A) 0.6 ng/mL and (B) 1.2 ng/mL PSA at the disposable ECL capillary-fill device. The ECL intensity-potential profiles at disposable ECL capillary-fill device containing 2.5 mg/mL MBs ECL probe after adding (C) 0.6 ng/mL and (D) 1.2 ng/mL PSA under different temperature. The ECL intensity-potential profiles at disposable ECL capillary-fill device containing 2.5 mg/mL of MBs ECL probe after adding (E) 0.6 ng/mL and (F) 1.2 ng/mL PSA at 30°C with different cleavage time. The ECL measurement was carried out in the 0.10 PBS (pH 7.40) containing 50 mM TPra with a scan rate of 100 mV/s. PMT= -900 V.

**Table S1** Comparison of the linear range and detection limit reported method with that of the developed method for the determination of PSA

| Method            | Linear range       | Detection limit | Time (h) | Ref       |
|-------------------|--------------------|-----------------|----------|-----------|
| Photothermal      | 1.0 to 50 ng/mL    | 0.40 ng/mL      | 2.0      | [2]       |
| Photothermal      | 1.0 to 64 ng/mL    | 2.1 ng/mL       | 4.0      | [3]       |
| Fluorescence      | 3.4 to 34 ng/mL    | 1.7 ng/mL       | 8.5      | [4]       |
| Fluorescence      | 4.4 to 71.3 ng/mL  | 4.4 ng/mL       | /        | [5]       |
| Fluorescence      | 0.2 to 12 ng/mL    | 0.06 ng/mL      | 0.25     | [6]       |
| Electrochemistry  | 2.0 to 10 ng/mL    | 1.95 ng/mL      | 1.0      | [7]       |
| Electrochemistry  | 1.0 to 200 ng/mL   | 0.40 ng/mL      | 1.25     | [8]       |
| Chemiluminescence | 1.0 to 100 ng/mL   | 0.60 ng/mL      | 0.50     | [9]       |
| ECL               | 2.25 to 11.3 ng/mL | 0.88 ng/mL      | 4.0      | [10]      |
| ECL               | 0.20 to 1.2 ng/mL  | 0.12 ng/mL      | 0.50     | This work |

## References

- [1]. J. Zhang, H. L. Qi, Z. J. Li, N. Zhang, Q. Gao and C. X. Zhang, *Anal. Chem.*, 2015, 87, 6510-6515
- [2]. G. Cai, Z. Yu, P. Tong and D. Tang, *Nanoscale* **2019**, 11, 15659-15667.
- [3]. W. Zhou, G. Fu and X. Li, *Anal. Chem.*, 2021, 93, 7754-7762.
- [4]. R. Zhao, Lu. Zhao, H. Feng, X. Chen, H. Zhang, Y. Bai, F. Feng and S. Shuang, *Analyst* **2021**, 146, 1340-1345.
- [5]. A. Craciun, S. Suarasan, M. Focsan and S. Astilean, *Talanta*, 2021, 228, 122242.
- [6]. B. Zhang, W. Gao, J. Piao, Y. Xiao, B. Wang, W. Peng, X. Gong, Z. Wang, H. Yang and J. Chang, *ACS Appl. Mater. Interfaces*, **2018**, 10, 14549-14558.
- [7]. T. Do, T. Phi, T. Nguy, P. Wagner, K. Eersels, M. Vestergaard and L. Truong, *J. Electron. Mater.*, **2017**, 46, 3542-3552.
- [8]. S. Traynor, G. Wang, R. Pandey, F. Li and S. Leyla, *Angew. Chem. Int. Ed.*, 2020, 59, 22617-22622.
- [9]. J. Chong, H. Chong and J. Lee, *Anal. Biochem.*, **2019**, 564-565, 102-107.
- [10]. A. Juzgado, A. Soldà, A. Ostric, A. Criado, G. Valenti, S. Rapino, G. Conti, G. Fracasso, F. Paolucci and M. Prato, *J. Mater. Chem. B*, **2017**, 5, 6681-6687.
